# Supplementary material for: Clinicopathologic characteristics and surgical outcome of synthetic fiber conjunctival granuloma
Source: Springer Nature journal article supplement (doi:10.1186/s12886-020-01717-1), 2020-11-16

# Clinical photographs of 18 patients with synthetic fiber conjunctival granuloma

Case 1

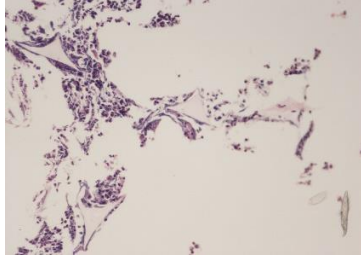

Case 2

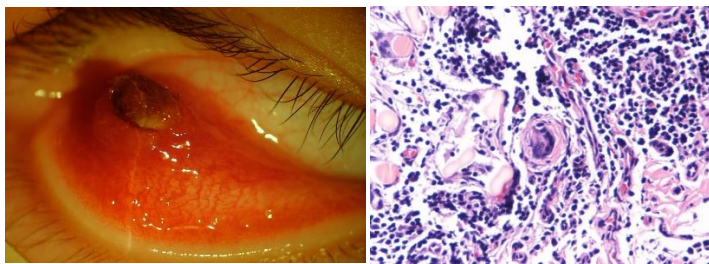

Case 3

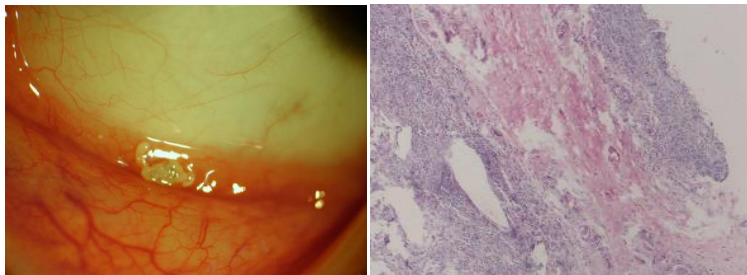

Case 4

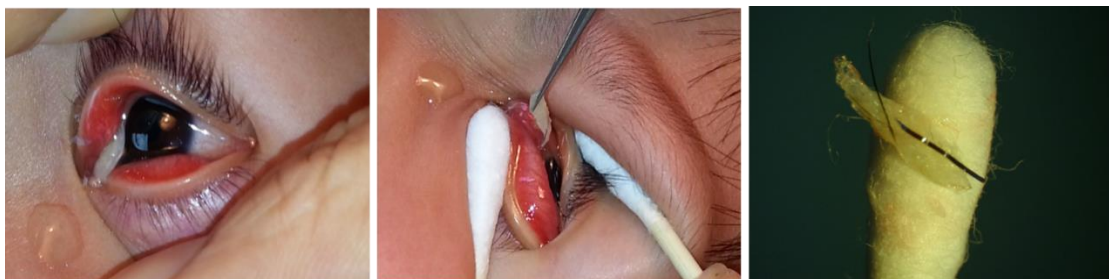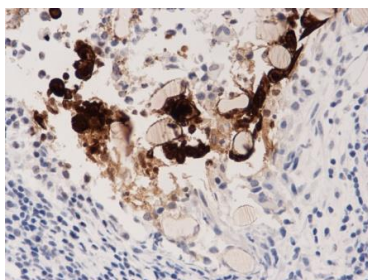

Case 5

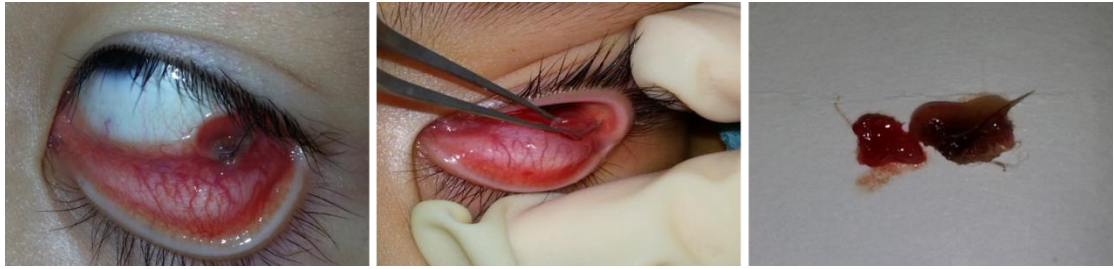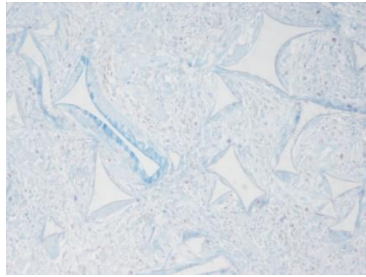

Case 6

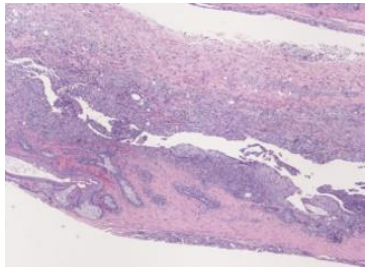

Case 7

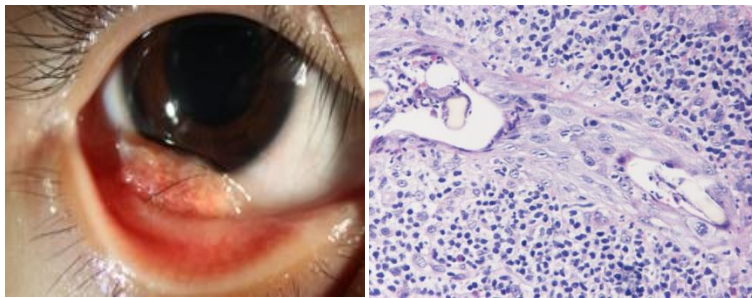

Case 8

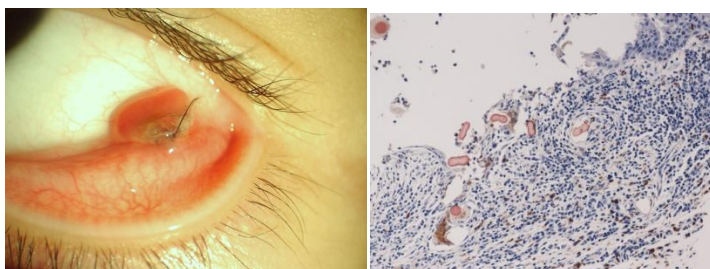

Case 9

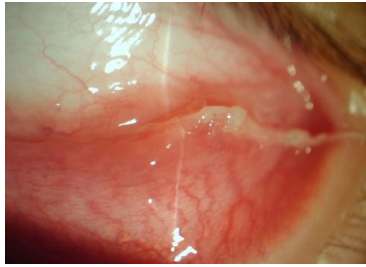

Case 10

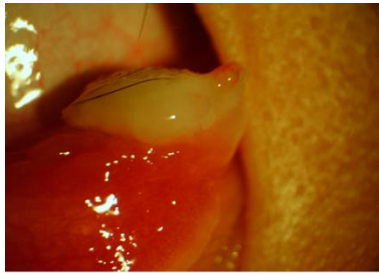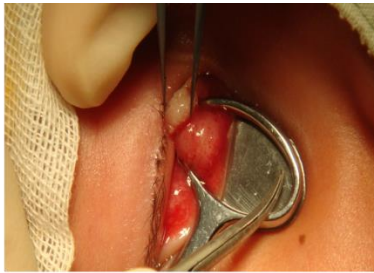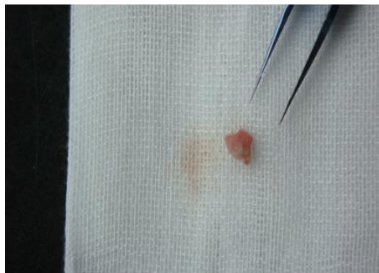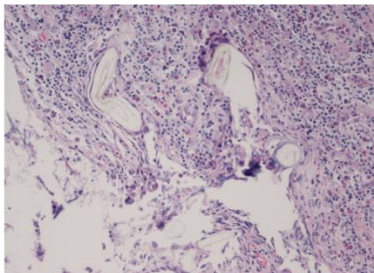

Case 11

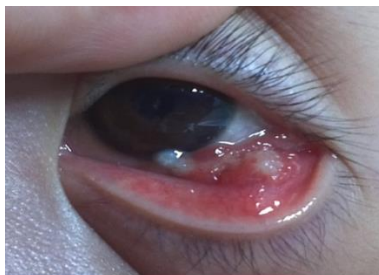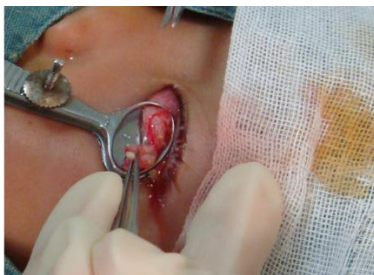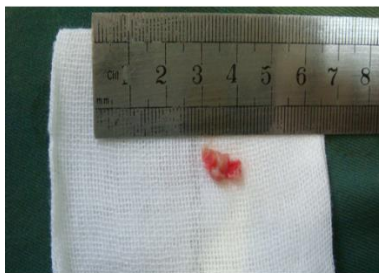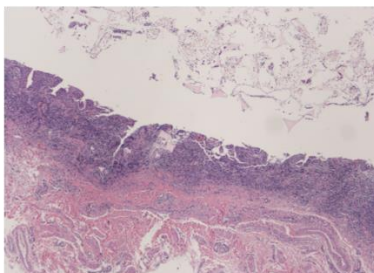

Case 12

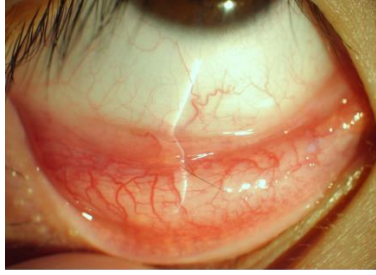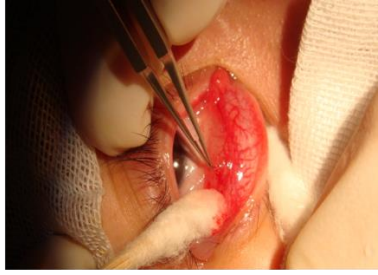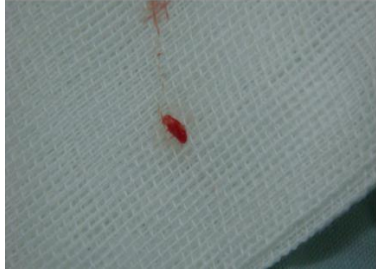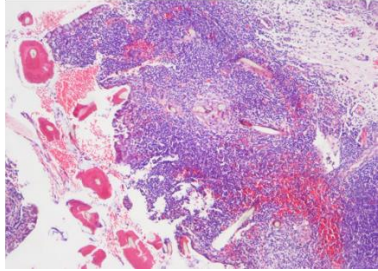

Case 13

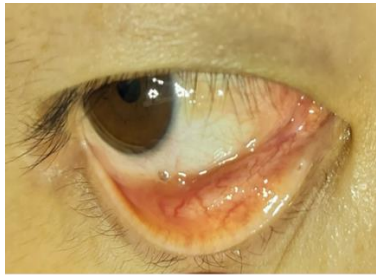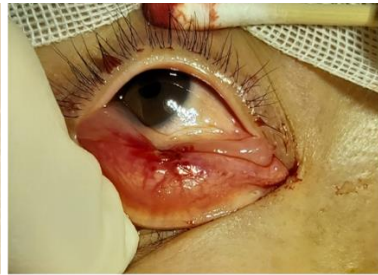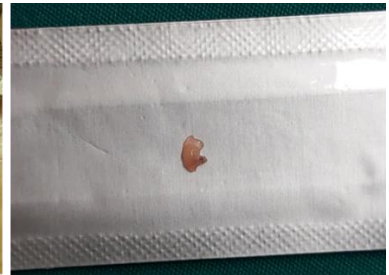

Case 14

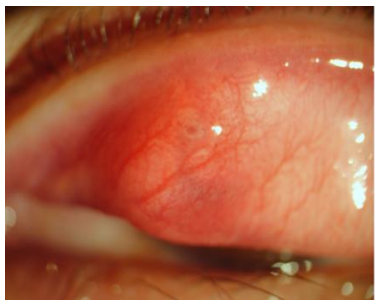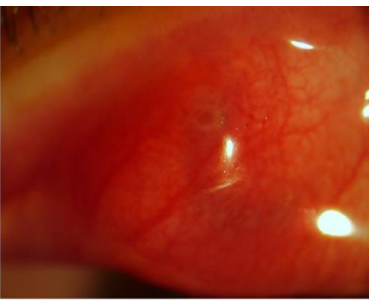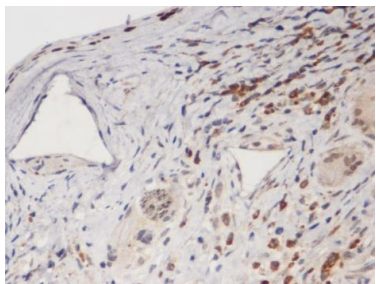

Case 15

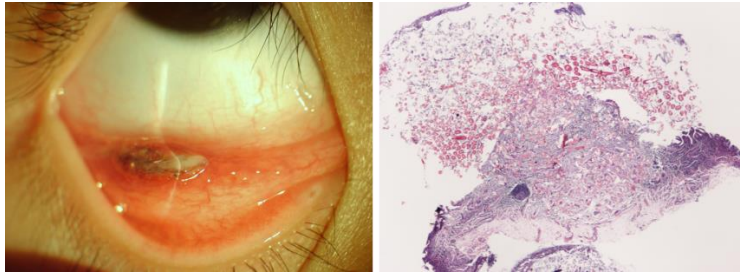

Case 16

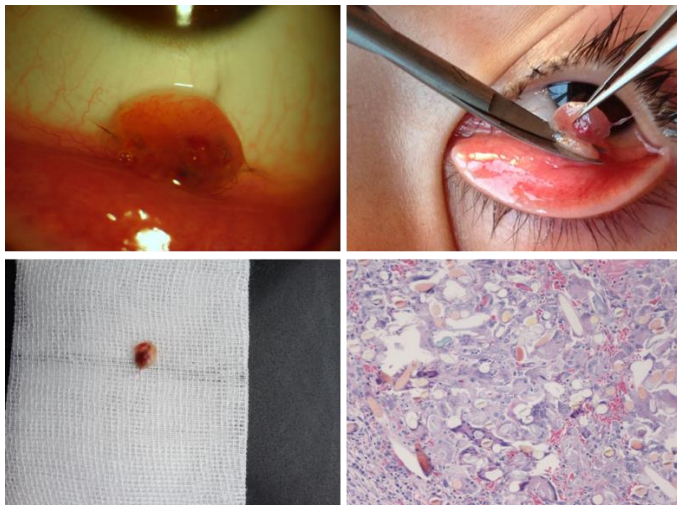

Case 17

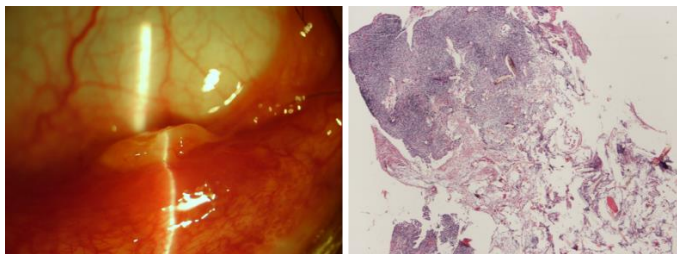

Case 18

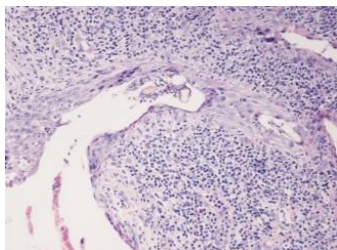

Supplement: MOESM1 [file 18590442]
